# Supplementary material
Source: publisher figshare collection journal article supplement (https://acs.figshare.com/ndownloader/files/26103122)
Supplement: Supplementary file 1 [file 26103122]

## Supporting Information

### **Identification of Metabolites in Basil Leaves by Desorption Electrospray Ionization Mass Spectrometry Imaging after Cd Contamination**

Vânia de Lourdes G. Teles<sup>1,2</sup>, Giselle V. Sousa<sup>1</sup>, Pedro H. Vendramini<sup>3</sup>, Rodinei Augusti<sup>4</sup> and Letícia M. Costa<sup>\*1</sup>

<sup>1</sup>LEAQUAA, Universidade Federal de Minas Gerais, Instituto de Ciências Exatas, Departamento de Química, CEP 31270-901, Belo Horizonte, Minas Gerais, Brazil.

<sup>2</sup>Universidade Estadual de Roraima, CEP 69306-530, Boa Vista, Roraima, Brazil

<sup>3</sup>Thomson Mass Spectrometry Laboratory, IQ-UNICAMP, CEP 13083-970, Campinas, São Paulo, Brazil.

<sup>4</sup>LEMS, Universidade Federal de Minas Gerais, Instituto de Ciências Exatas, Departamento de Química, CEP 31270-901, Belo Horizonte, Minas Gerais, Brazil.

\* Email: leticia@qui.ufmg.br, lemalta41@gmail.com; Phone: +55 31 3409 5764

## List of Supporting Information

**Table S1.** CCD results for the optimization of Cd concentration in basil leaves (L), stems (S) and roots (R)

**Table S2.** LOD and LOQ of the ultrasound-assisted micro-extraction procedure for Cd determination by FS FAAS

**Figure S1.** Cd concentration in acid solutions containing micronutrients, macronutrients and multi-element solutions: low ( $0.1 \text{ mg L}^{-1}$  Cu, Fe, Mn and Zn and  $200 \text{ mg L}^{-1}$  Ca, K and Mg), middle ( $0.15 \text{ mg L}^{-1}$  Cu, Fe, Mn and Zn and  $400 \text{ mg L}^{-1}$  Ca, K and Mg) and high ( $0.2 \text{ mg L}^{-1}$  Cu, Fe, Mn and Zn and  $600 \text{ mg L}^{-1}$  Ca, K and Mg) ( $n = 3$ ).

**Figure S2.** Pictures of leaves of basil, control (without  $\text{Cd}^{2+}$ ) and  $10 \text{ } \mu\text{mol L}^{-1}$   $\text{Cd}^{2+}$  exposure, in double-sided adhesive tape to direct analysis by DESI-MSI

**Figure S3.** DESI images of phytohormones in leaves of basil, control (without  $\text{Cd}^{2+}$ ) and  $10 \text{ } \mu\text{mol L}^{-1}$   $\text{Cd}^{2+}$  exposure: (a) jasmonic acid ( $\text{Na}^+$  adduct,  $m/z$  233.11147), (b) methyl dihydrojasmonate ( $\text{Na}^+$  adduct,  $m/z$  249.1460), (c) abscisic acid ( $\text{Na}^+$  adduct,  $m/z$  287.1252), (d) (-)-jasmonoyl-L-isoleucine ( $m/z$  324.2167), (e) auxin b ( $\text{Na}^+$  adduct,  $m/z$  333.2037) and (f) auxin a ( $\text{Na}^+$  adduct,  $m/z$  351.2138). The pixel size is  $200 \text{ } \mu\text{m}$ .

**Figure S4.** DESI image of sugars in leaves of basil, control (without  $\text{Cd}^{2+}$ ) and  $10 \text{ } \mu\text{mol L}^{-1}$   $\text{Cd}^{2+}$  exposure: (a) carbohydrates ( $\text{Na}^+$  adduct,  $m/z$  335.0947) and (b) disaccharide ( $\text{Na}^+$  adduct,  $m/z$  365.1053). The pixel size is  $200 \text{ } \mu\text{m}$ .

**Figure S5.** DESI image of amino acids in leaves of basil, control (without  $\text{Cd}^{2+}$ ) and  $10 \text{ } \mu\text{mol L}^{-1}$   $\text{Cd}^{2+}$  exposure: (a) amino acids ( $m/z$  118.0864) (b) leucine ( $m/z$  132.1019), (c) glutamine ( $m/z$  147.0764), (d) arginine ( $m/z$  175.1191), (e) peptides ( $[(\text{M}+\text{H}-2\text{H}_2\text{O})]^+$ ,  $m/z$  293.0598), (f) peptides ( $m/z$  306.1601), (g) peptides ( $m/z$  435.2355), (h) peptides ( $m/z$  613.2468). The pixel size is  $200 \text{ } \mu\text{m}$ .

**Figure S6.** DESI image of other metabolites in leaves of basil, control (without  $\text{Cd}^{2+}$ ) and  $10 \text{ } \mu\text{mol L}^{-1}$   $\text{Cd}^{2+}$  exposure: (a) choline ( $m/z$  104.1073), (b) spermidine ( $m/z$  146.1652), (c) fatty acid esters ( $\text{Na}^+$  adduct,  $m/z$  169.0471), (d) jasmolone glucoside ( $\text{Na}^+$  adduct,  $m/z$  365.1571) and (e) methylpicraquassioside A ( $\text{K}^+$  adduct,  $m/z$  451.1004). The pixel size is  $200 \text{ } \mu\text{m}$ .

**Figure S7.** Expanded view (from  $m/z$  100 to 300) of the average MS (positive ion mode) of amino acids obtained (a) line 25 of the control leaf of basil (without  $\text{Cd}^{2+}$ ) and (b) line 81 of the contaminated basil leaf ( $10 \mu\text{mol L}^{-1} \text{Cd}^{2+}$ ). Amplifications, indicated above each ion, were used to facilitate visualization in Mass Spectrum. The  $m/z$  ratios are indicated above each amino acid.

**Figure S8.** Expanded view (from  $m/z$  300 to 650) of the average MS (positive ion mode) of amino acids obtained (a) line 25 of the control leaf of basil (without  $\text{Cd}^{2+}$ ) and (b) line 81 of the contaminated basil leaf ( $10 \mu\text{mol L}^{-1} \text{Cd}^{2+}$ ). Amplifications, indicated above each ion, were used to facilitate visualization in Mass Spectrum. The  $m/z$  ratios are indicated above each amino acid.

**Figure S9.** Expanded view (from  $m/z$  295 to 500) of the average MS (positive ion mode) of flavonoids obtained line 78 of the contaminated leaf of basil ( $10 \mu\text{mol L}^{-1} \text{Cd}^{2+}$ ). Amplifications, indicated above each ion, were used to facilitate visualization in Mass Spectrum. The  $m/z$  ratios are indicated above each flavonoid.

**Figure S10.** Expanded view (from  $m/z$  150 to 400) of the average MS (positive ion mode) of phytohormones obtained (a) line 25 of the control leaf of basil (without  $\text{Cd}^{2+}$ ) and (b) line 80 of the contaminated leaf of basil ( $10 \mu\text{mol L}^{-1} \text{Cd}^{2+}$ ). Amplifications, indicated above each ion, were used to facilitate visualization in Mass Spectrum. The  $m/z$  ratios are indicated above each phytohormone.

**Figure S11.** Expanded view (from  $m/z$  200 to 400) of the average MS (positive ion mode) of sugars obtained (a) line 7 of the control leaf of basil (without  $\text{Cd}^{2+}$ ) and (b) line 78 of the contaminated leaf of basil ( $10 \mu\text{mol L}^{-1} \text{Cd}^{2+}$ ). Amplifications, indicated above each ion, were used to facilitate visualization in Mass Spectrum. The  $m/z$  ratios are indicated above each sugar

**Figure S12.** Expanded view (from  $m/z$  100 to 500) of the average MS (positive ion mode) of common compounds in plants obtained (a) line 25 of the control leaf of basil (without  $\text{Cd}^{2+}$ ) and (b) line 80 of the contaminated leaf of basil ( $10 \mu\text{mol L}^{-1} \text{Cd}^{2+}$ ). Amplifications, indicated above each ion, were used to facilitate visualization in Mass Spectrum. The  $m/z$  ratios are indicated above each compound.

**Table S1.** CCD results for the optimization of Cd concentration in basil leaves (L), stems (S) and roots (R)

| Experiment | HNO <sub>3</sub><br>(%) | H <sub>2</sub> O <sub>2</sub><br>(μL) | Concentration in Matrix (μg g <sup>-1</sup> ) |     |      | OR (μg g <sup>-1</sup> ) |
|------------|-------------------------|---------------------------------------|-----------------------------------------------|-----|------|--------------------------|
|            |                         |                                       | L                                             | S   | R    |                          |
| 1          | 2                       | 50                                    | 106                                           | 277 | 1193 | 2.38                     |
| 2          | 2                       | 100                                   | 137                                           | 332 | 1199 | 2.76                     |
| 3          | 10                      | 50                                    | 102                                           | 309 | 1201 | 2.44                     |
| 4          | 10                      | 100                                   | 96.5                                          | 290 | 1161 | 2.32                     |
| 5          | 12                      | 75                                    | 122                                           | 322 | 1175 | 2.60                     |
| 6          | 0.4                     | 75                                    | 107                                           | 340 | 1421 | 2.72                     |
| 7          | 6                       | 110                                   | 104                                           | 285 | 1440 | 2.55                     |
| 8          | 6                       | 40                                    | 73.4                                          | 243 | 1072 | 1.96                     |
| CP         | 6                       | 75                                    | 88.5                                          | 290 | 1346 | 2.39                     |
| CP         | 6                       | 75                                    | 99.1                                          | 320 | 1371 | 2.57                     |
| CP         | 6                       | 75                                    | 92.2                                          | 279 | 1317 | 2.37                     |
| CP         | 6                       | 75                                    | 86.5                                          | 358 | 1356 | 2.57                     |

$$OR_{Cd} = 2.47 - 0.0674x_A + 0.1377x_B - 0.1259x_{AB} + 0.0959x_A^2 - 0.1055x_B^2$$

where, 2.47 is the average from the total observations whereas  $x_A$ ,  $x_B$  and  $x_{AB}$  represent the effects of each factor, i.e. A, B and their interaction, respectively. The average for predicted values was approximately 2.5, confirming that the response surface model for two factors was accurate, according to the equation. CP = central point

**Table S2** LOD and LOQ of the ultrasound-assisted micro-extraction procedure for Cd determination by FS FAAS

| Regression Equation  | Correlation coefficient (R) | Method                    |                           | Matrix | Sample                     |                            |
|----------------------|-----------------------------|---------------------------|---------------------------|--------|----------------------------|----------------------------|
|                      |                             | LOD (μg L <sup>-1</sup> ) | LOQ (μg L <sup>-1</sup> ) |        | LOD (μg kg <sup>-1</sup> ) | LOQ (μg kg <sup>-1</sup> ) |
| $y = 0.216x + 0.004$ | 0.991                       | 6                         | 17                        | L      | 61                         | 111                        |
|                      |                             |                           |                           | S      | 66                         | 100                        |
|                      |                             |                           |                           | R      | 104                        | 139                        |

For the method, LOD and LOQ = 3 and 10 times the standard deviation of the blank solution, divided by the slope of the calibration curve, respectively. For the blank samples, LOD and LOQ were  $\bar{X} + t(n-1, 1-\alpha).s$  and  $\bar{X} + 10.s$ , respectively, where  $\bar{X}$  is the average of the blank samples values, s is the standard deviation and t-distribution at 95% confidence level.

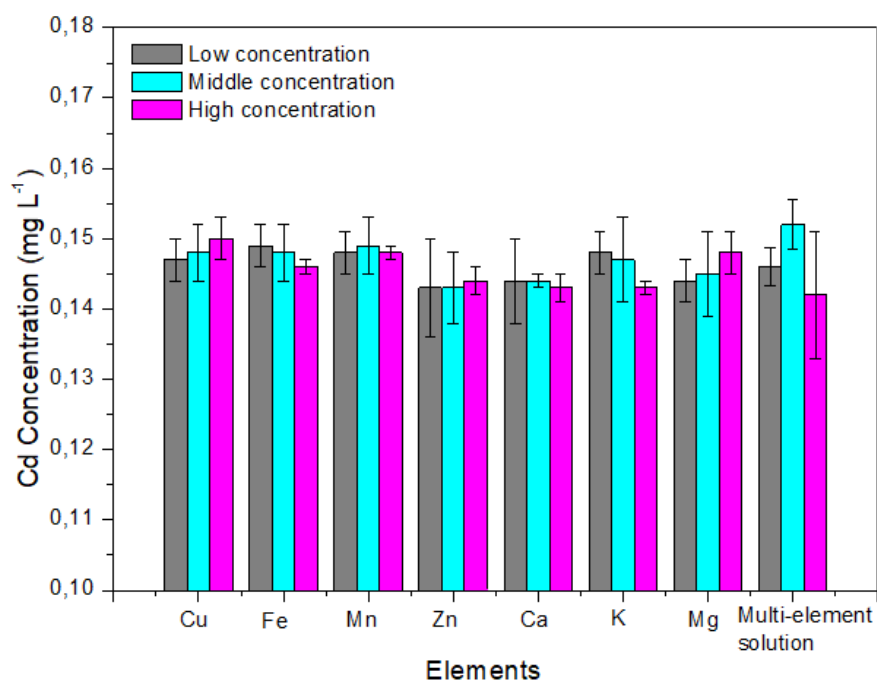

**Figure S1.** Cd concentration in acid solutions containing micronutrients, macronutrients and multi-element solutions: low (0.1 mg L<sup>-1</sup> Cu, Fe, Mn and Zn and 200 mg L<sup>-1</sup> Ca, K and Mg), middle (0.15 mg L<sup>-1</sup> Cu, Fe, Mn and Zn and 400 mg L<sup>-1</sup> Ca, K and Mg) and high (0.2 mg L<sup>-1</sup> Cu, Fe, Mn and Zn and 600 mg L<sup>-1</sup> Ca, K and Mg) (n = 3).

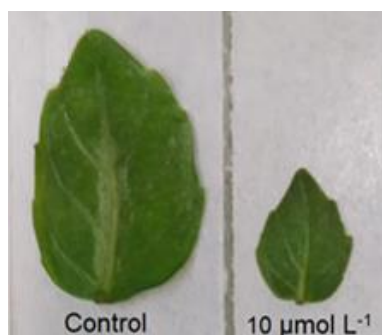

**Figure S2.** Pictures of leaves of basil, control (without  $\text{Cd}^{2+}$ ) and  $10 \mu\text{mol L}^{-1} \text{Cd}^{2+}$  exposure, in double-sided adhesive tape to direct analysis by DESI-MSI

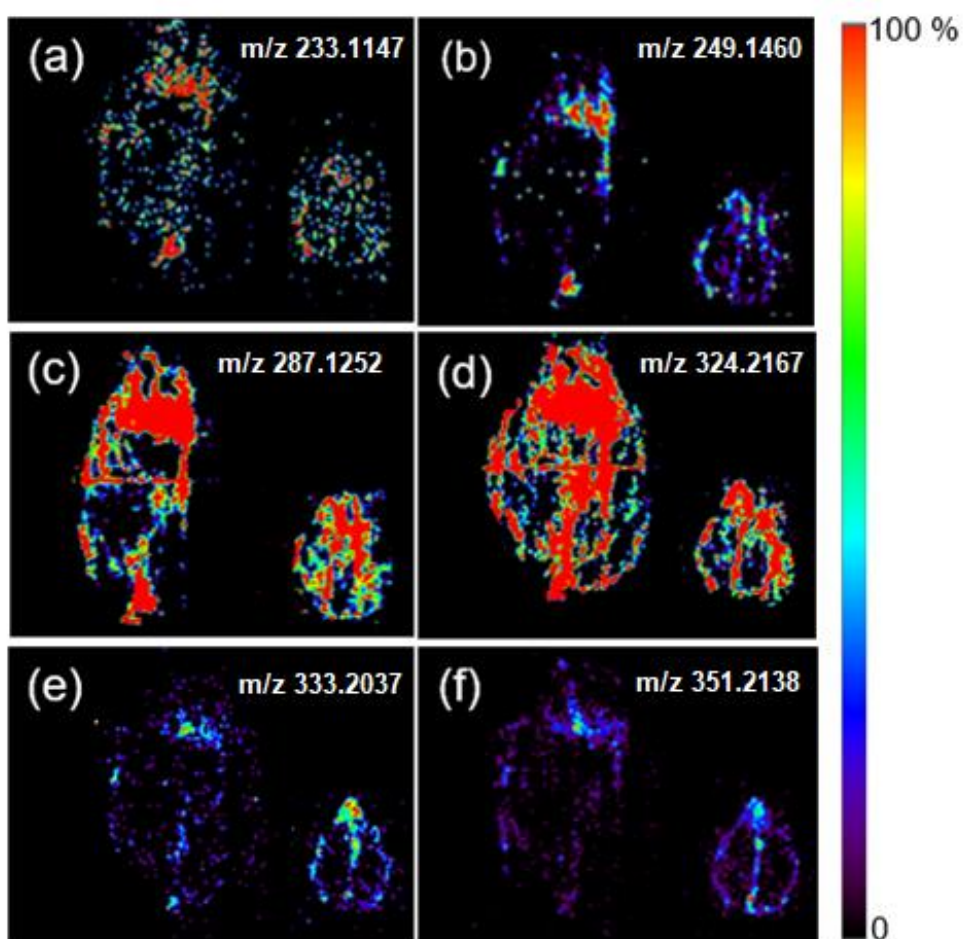

**Figure S3.** DESI images of phytohormones in leaves of basil, control (without  $\text{Cd}^{2+}$ ) and  $10 \mu\text{mol L}^{-1} \text{Cd}^{2+}$  exposure: (a) jasmonic acid ( $\text{Na}^+$  adduct,  $m/z$  233.11147), (b) methyl dihydrojasmonate ( $\text{Na}^+$  adduct,  $m/z$  249.1460), (c) abscisic acid ( $\text{Na}^+$  adduct,  $m/z$  287.1252), (d) (-)-jasmonoyl-L-isoleucine ( $m/z$  324.2167), (e) auxin b ( $\text{Na}^+$  adduct,  $m/z$  333.2037) and (f) auxin a ( $\text{Na}^+$  adduct,  $m/z$  351.2138). The pixel size is  $200 \mu\text{m}$ .

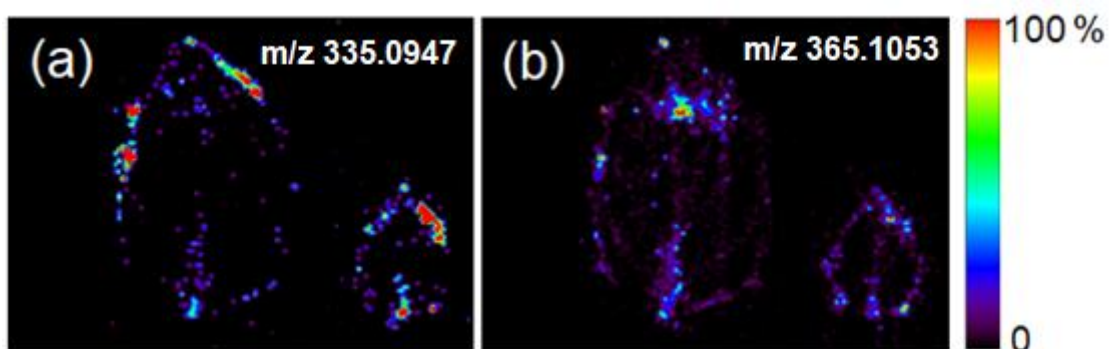

**Figure S4.** DESI image of sugars in leaves of basil, control (without  $\text{Cd}^{2+}$ ) and  $10 \mu\text{mol L}^{-1}$   $\text{Cd}^{2+}$  exposure: (a) carbohydrates ( $\text{Na}^+$  adduct,  $m/z$  335.0947) and (b) disaccharide ( $\text{Na}^+$  adduct,  $m/z$  365.1053). The pixel size is  $200 \mu\text{m}$ .

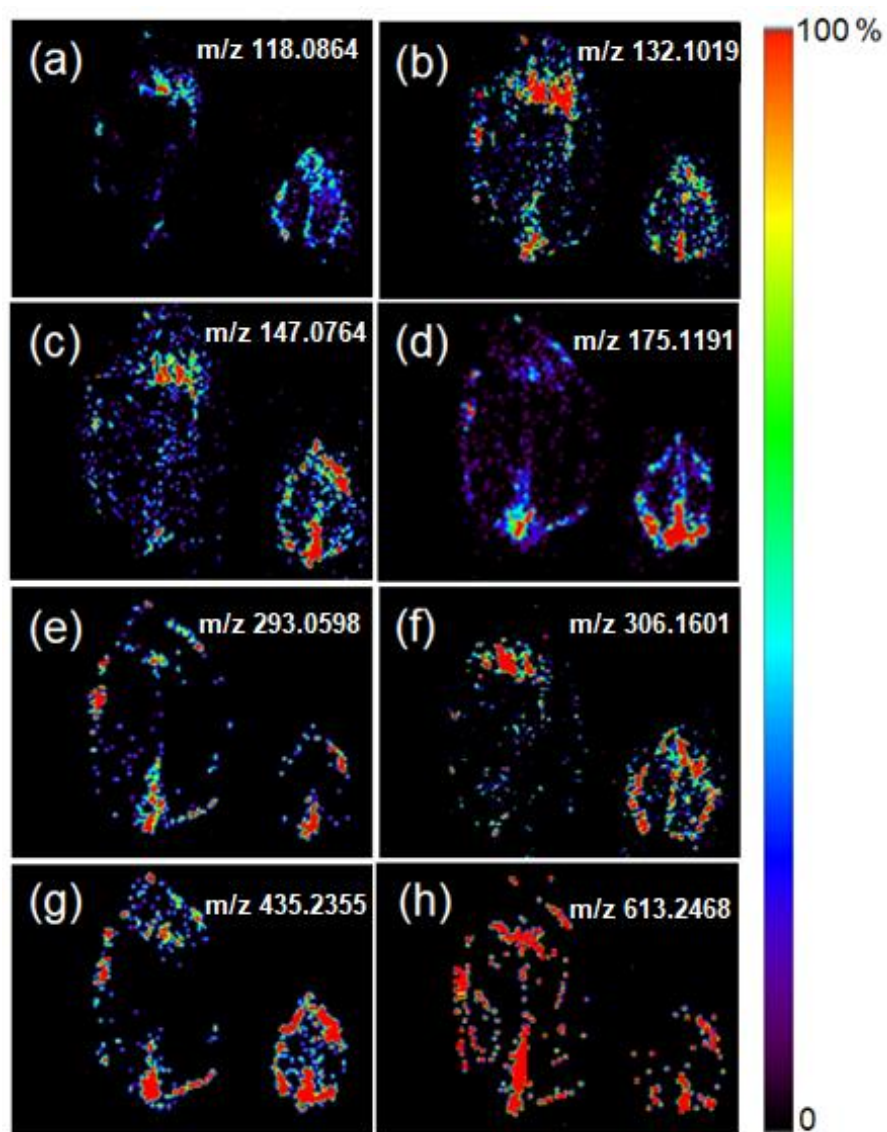

**Figure S5.** DESI image of amino acids in leaves of basil, control (without  $\text{Cd}^{2+}$ ) and  $10 \mu\text{mol L}^{-1}$   $\text{Cd}^{2+}$  exposure: (a) amino acids ( $m/z$  118.0864) (b) leucine ( $m/z$

132.1019), (c) glutamine ( $m/z$  147.0764), (d) arginine ( $m/z$  175.1191), (e) peptides ( $([M+H-2H_2O]^+$ ,  $m/z$  293.0598), (f) peptides ( $m/z$  306.1601), (g) peptides ( $m/z$  435.2355), (h) peptides ( $m/z$  613.2468). The pixel size is 200  $\mu$ m.

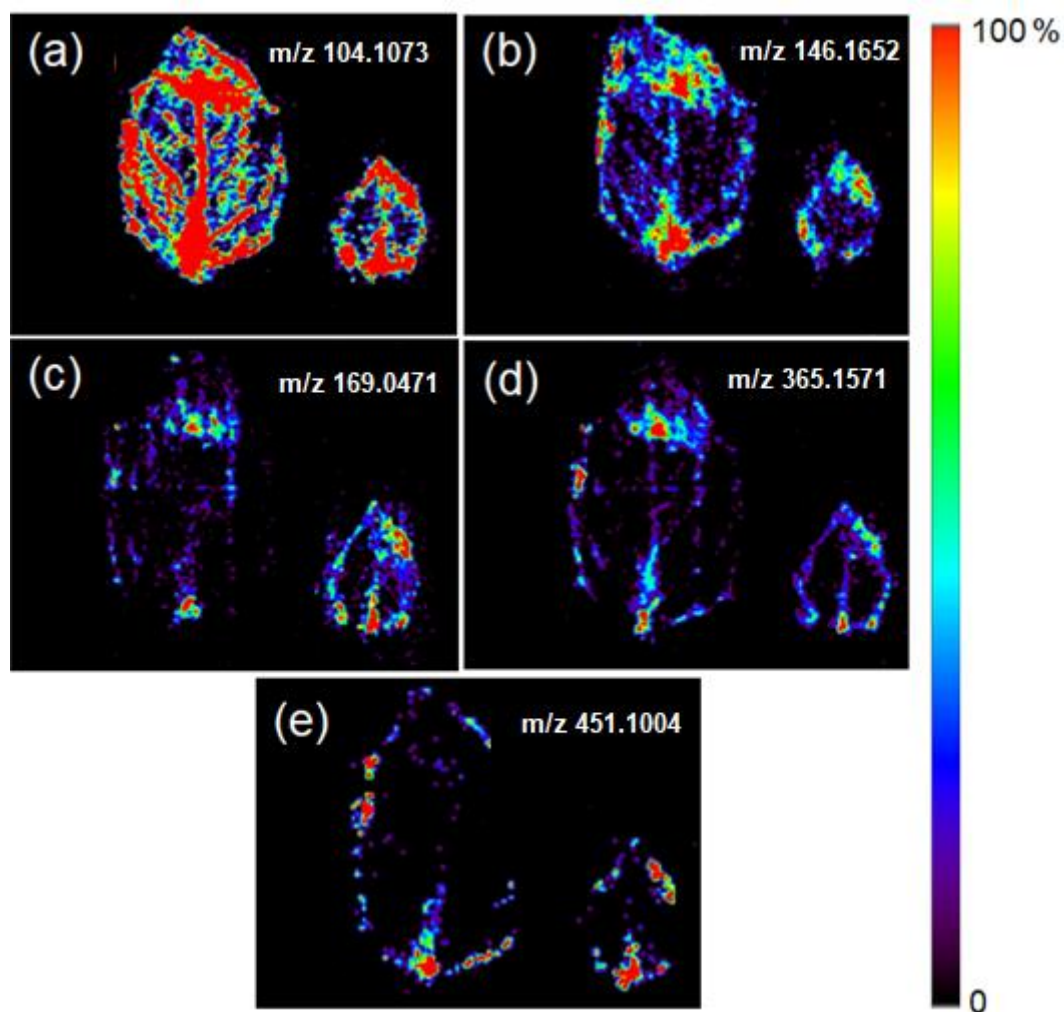

**Figure S6.** DESI image of other metabolites in leaves of basil, control (without  $Cd^{2+}$ ) and 10  $\mu$ mol  $L^{-1}$   $Cd^{2+}$  exposure: (a) choline ( $m/z$  104.1073), (b) spermidine ( $m/z$  146.1652), (c) fatty acid esters ( $Na^+$  adduct,  $m/z$  169.0471), (d) jasmolone glucoside ( $Na^+$  adduct,  $m/z$  365.1571) and (e) methylpicraquassioside A ( $K^+$  aduct,  $m/z$  451.1004). The pixel size is 200  $\mu$ m.



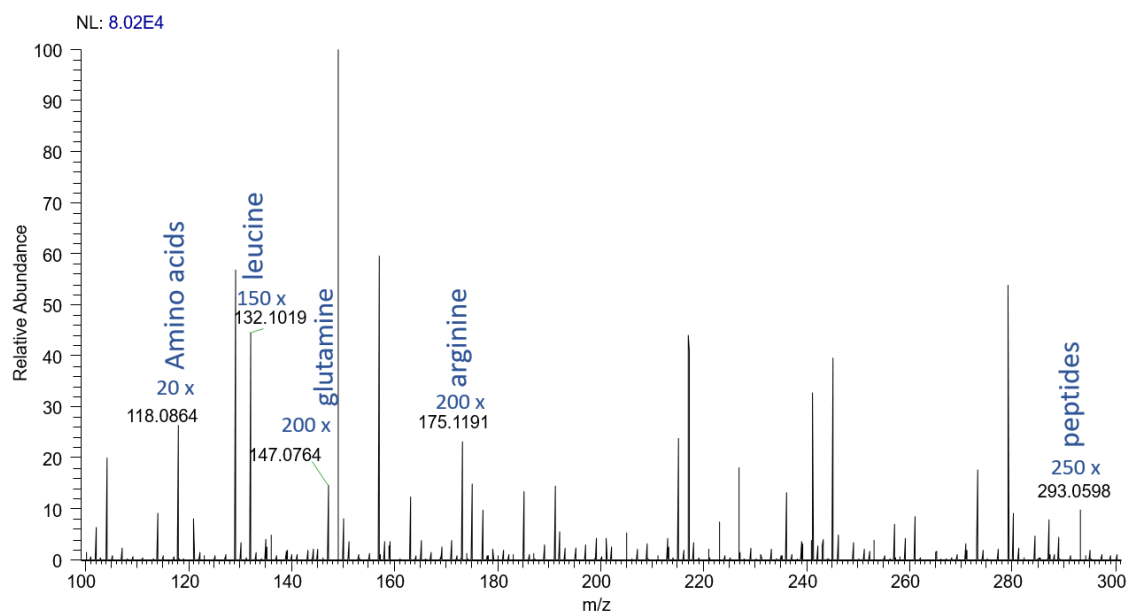

(a) Control leaf

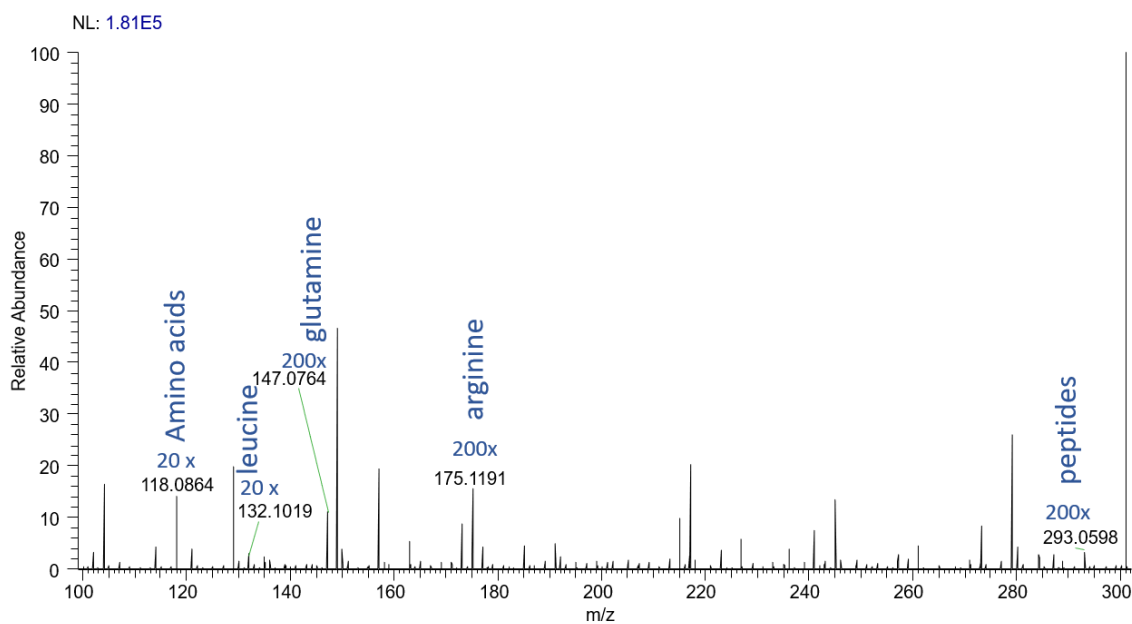

(b) Leaf exposure to Cd<sup>2+</sup> (10 μmol L<sup>-1</sup> Cd<sup>2+</sup>)

**Figure S7.** Expanded view (from  $m/z$  100 to 300) of the average MS (positive ion mode) of amino acids obtained (a) line 25 of the control leaf of basil (without Cd<sup>2+</sup>) and (b) line 81 of the contaminated leaf of basil (10 μmol L<sup>-1</sup> Cd<sup>2+</sup>). Amplifications, indicated above each ion, were used to facilitate visualization in Mass Spectrum. The  $m/z$  ratios are indicated above each amino acid.

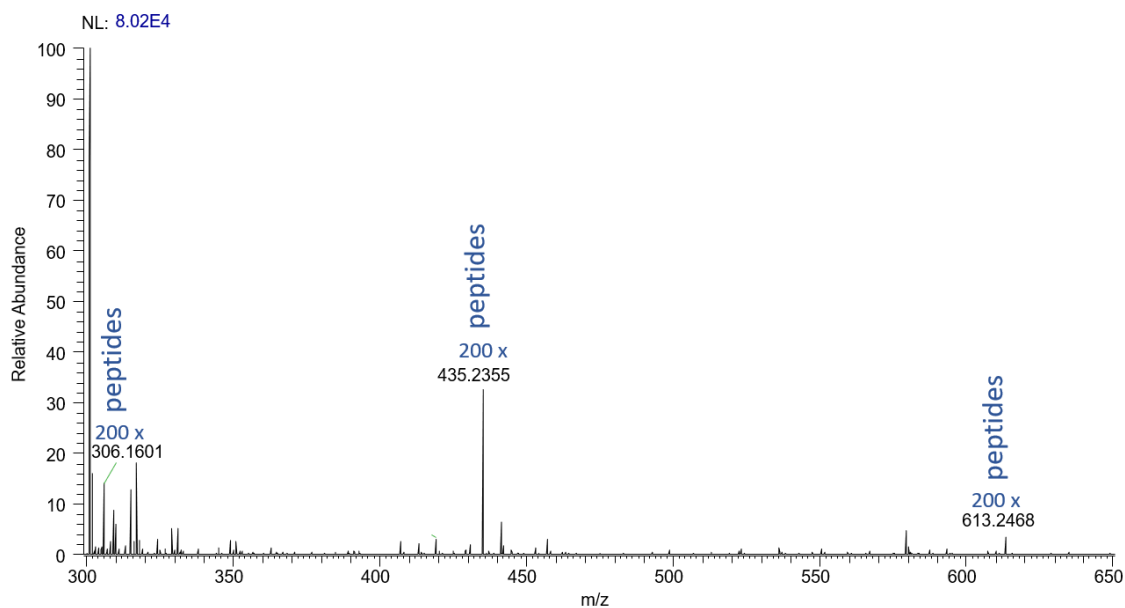

(a) Control leaf

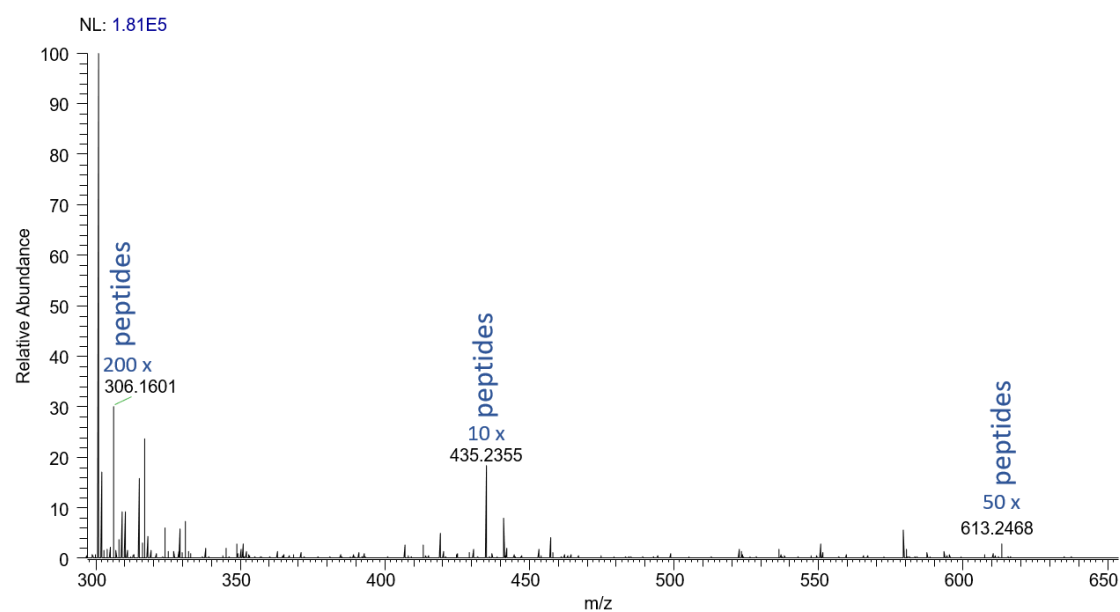

(b) Leaf exposure to Cd<sup>2+</sup> (10 µmol L<sup>-1</sup> Cd<sup>2+</sup>)

**Figure S8.** Expanded view (from  $m/z$  300 to 650) of the average MS (positive ion mode) of amino acids obtained (a) line 25 of the control leaf of basil (without Cd<sup>2+</sup>) and (b) line 81 of the contaminated leaf of basil (10 µmol L<sup>-1</sup> Cd<sup>2+</sup>). Amplifications, indicated above each ion, were used to facilitate visualization in Mass Spectrum. The  $m/z$  ratios are indicated above each amino acid.

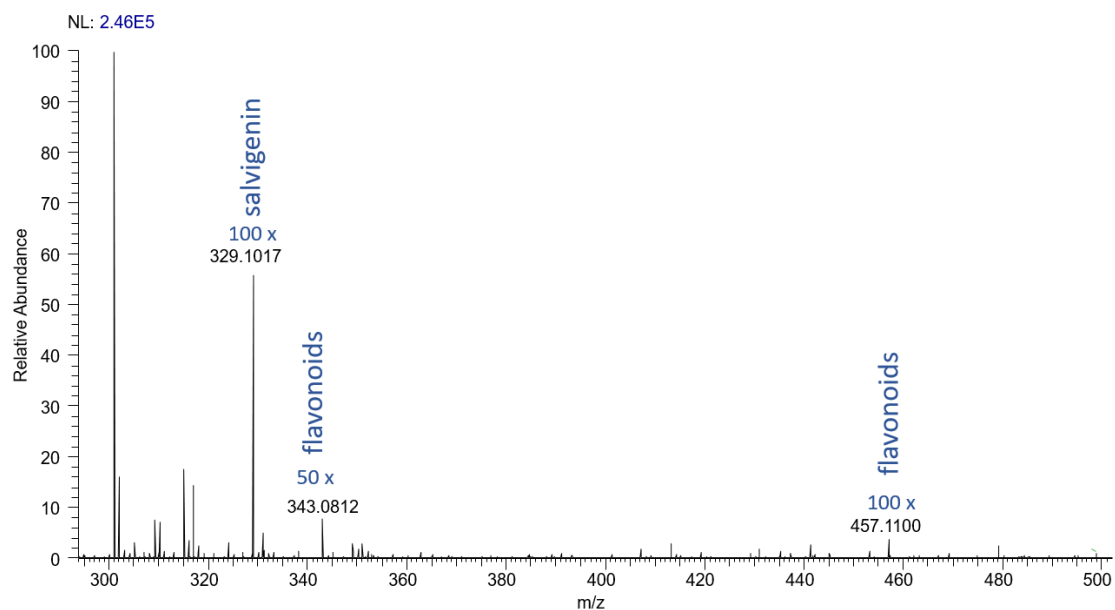

**Figure S9.** Expanded view (from  $m/z$  295 to 500) of the average MS (positive ion mode) of flavonoids obtained line 78 of the contaminated leaf of basil ( $10 \mu\text{mol L}^{-1} \text{Cd}^{2+}$ ). Amplifications, indicated above each ion, were used to facilitate visualization in Mass Spectrum. The  $m/z$  ratios are indicated above each flavonoid.

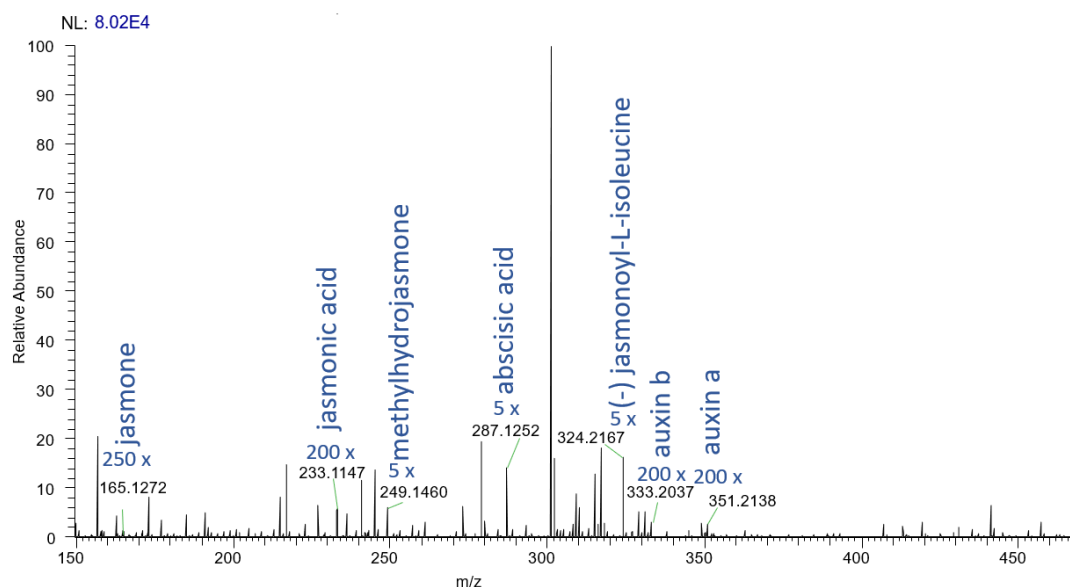

(a) Control leaf

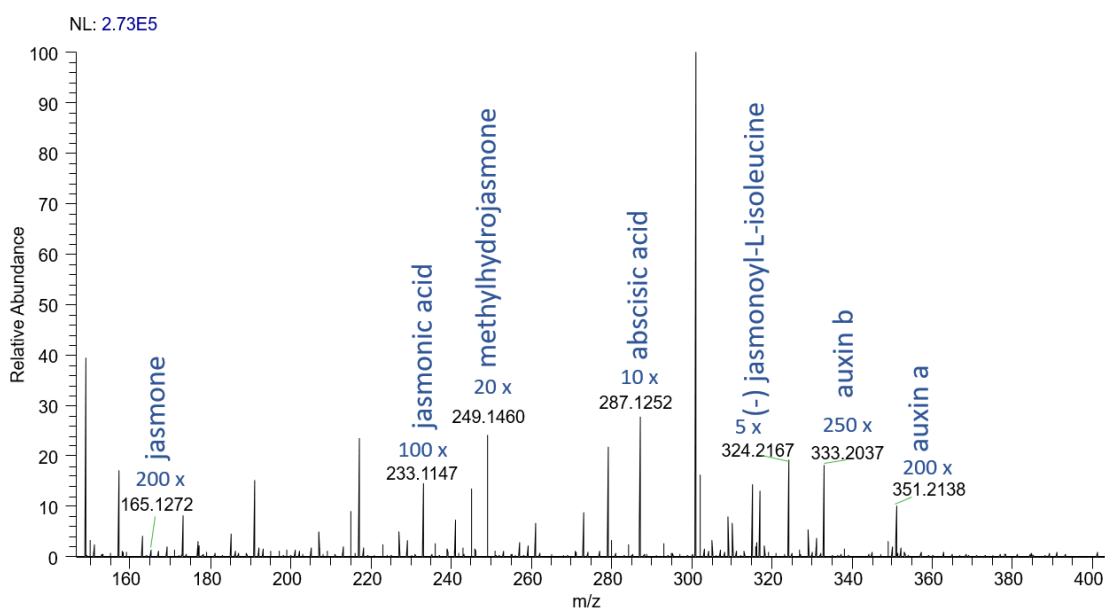

(b) Leaf exposure to Cd<sup>2+</sup> (10 μmol L<sup>-1</sup> Cd<sup>2+</sup>)

**Figure S10.** Expanded view (from  $m/z$  150 to 400) of the average MS (positive ion mode) of phytohormones obtained (a) line 25 of the control leaf of basil (without Cd<sup>2+</sup>) and (b) line 80 of the contaminated leaf of basil (10 μmol L<sup>-1</sup> Cd<sup>2+</sup>). Amplifications, indicated above each ion, were used to facilitate visualization in Mass Spectrum. The  $m/z$  ratios are indicated above each phytohormone.

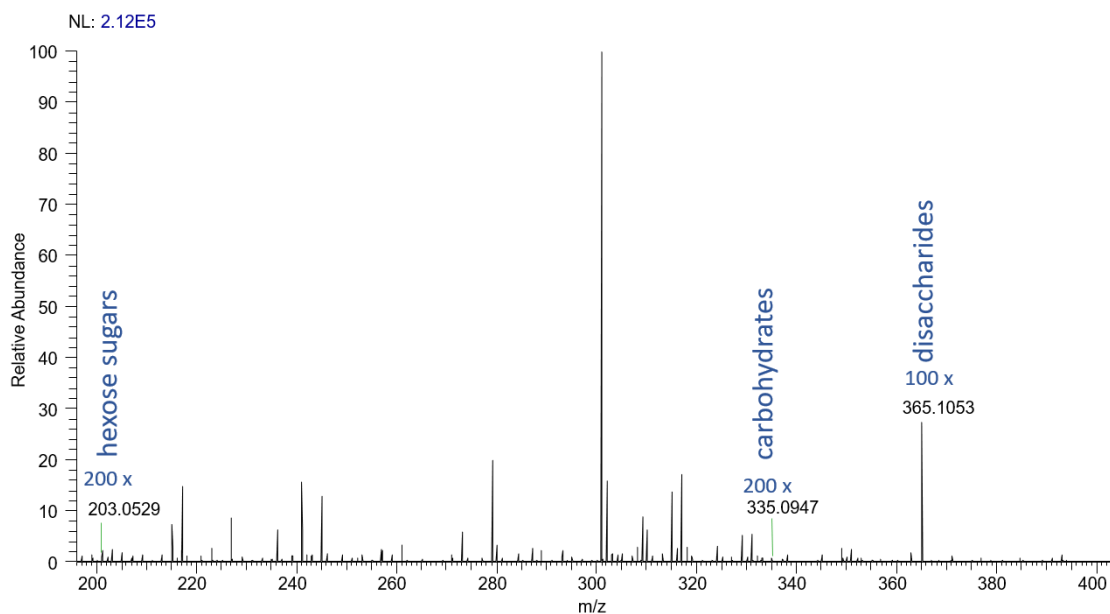

(a) Control leaf

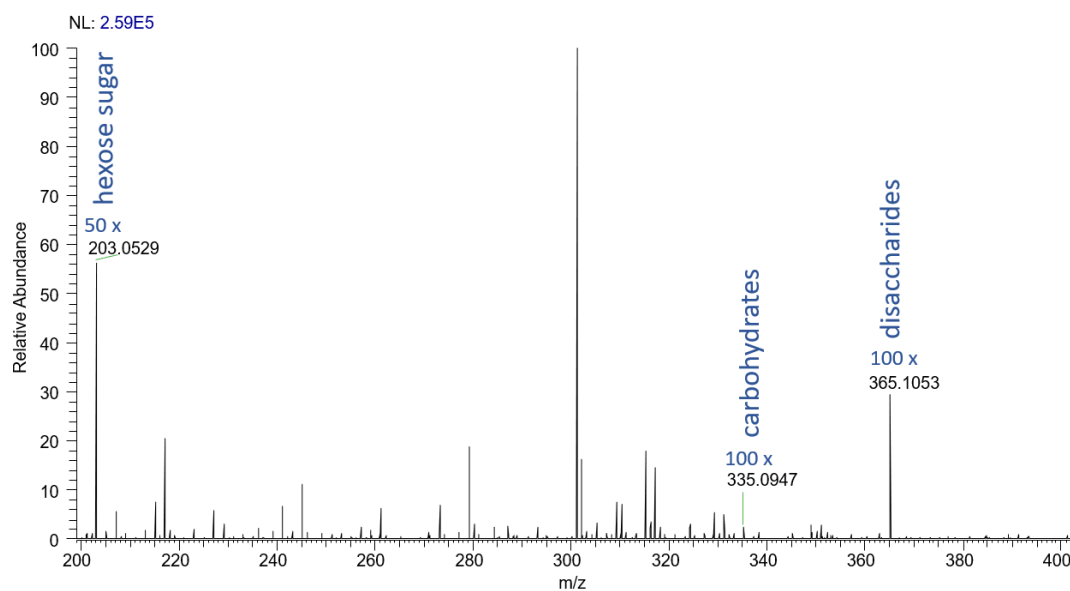

(b) Leaf exposure to  $\text{Cd}^{2+}$  ( $10 \mu\text{mol L}^{-1} \text{Cd}^{2+}$ )

**Figure S11.** Expanded view (from  $m/z$  200 to 400) of the average MS (positive ion mode) of sugars obtained (a) line 7 of the control leaf of basil (without  $\text{Cd}^{2+}$ ) and (b) line 78 of the contaminated leaf of basil ( $10 \mu\text{mol L}^{-1} \text{Cd}^{2+}$ ). Amplifications, indicated above each ion, were used to facilitate visualization in Mass Spectrum. The  $m/z$  ratios are indicated above each sugar

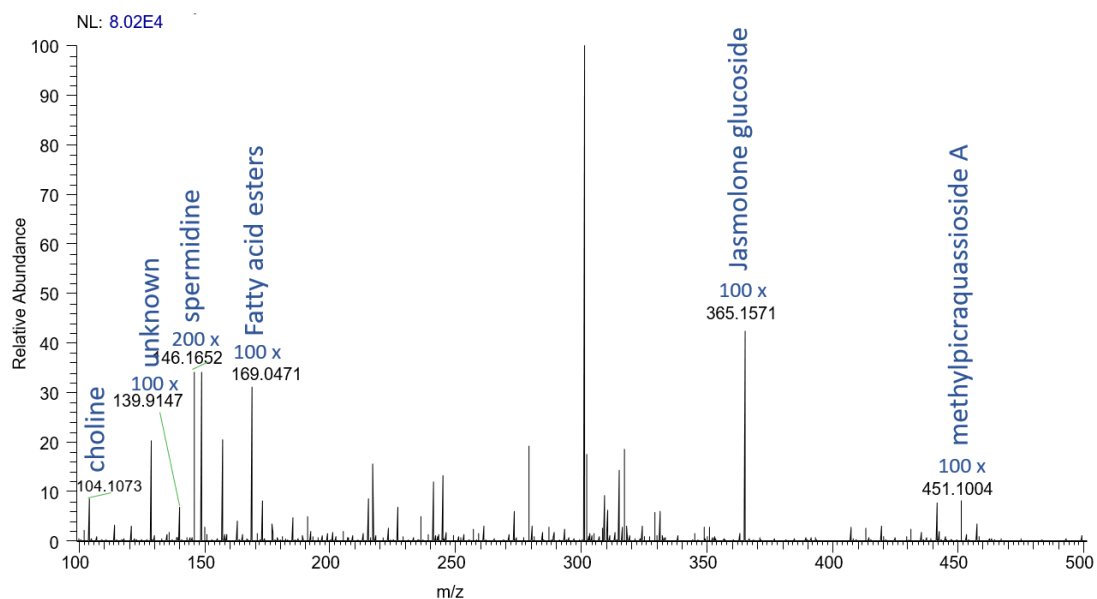

(a) Control leaf

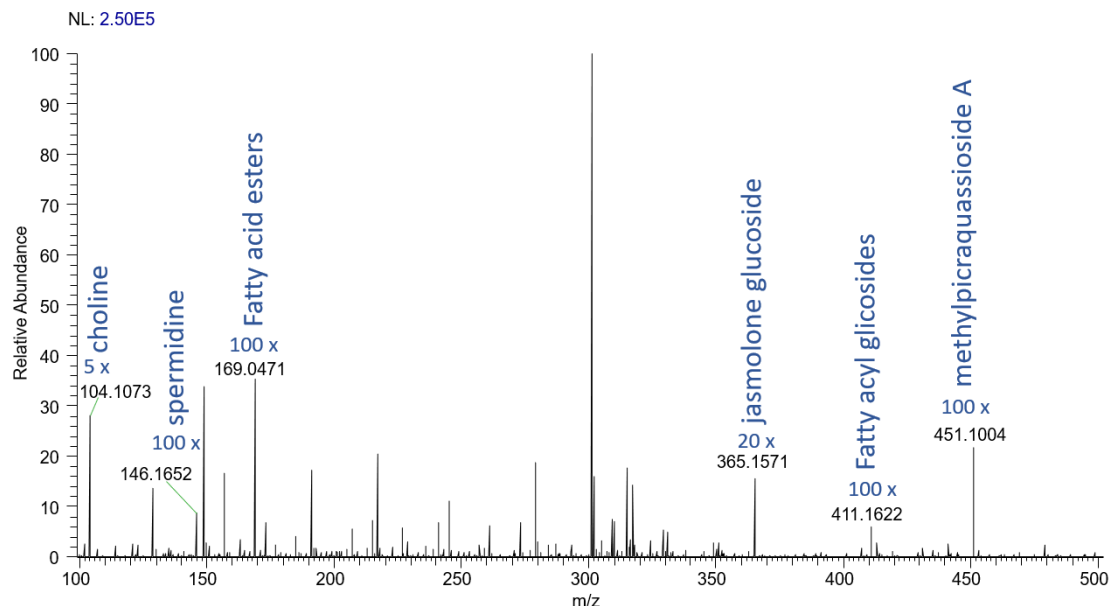

(b) Leaf exposure to  $\text{Cd}^{2+}$  ( $10 \mu\text{mol L}^{-1} \text{Cd}^{2+}$ )

**Figure S12.** Expanded view (from  $m/z$  100 to 500) of the average MS (positive ion mode) of common compounds in plants obtained (a) line 25 of the control leaf of basil (without  $\text{Cd}^{2+}$ ) and (b) line 80 of the contaminated leaf of basil ( $10 \mu\text{mol L}^{-1} \text{Cd}^{2+}$ ). Amplifications, indicated above each ion, were used to facilitate visualization in Mass Spectrum. The  $m/z$  ratios are indicated above each compound.
